# Supplementary material for: One-pot synthesis of self-healable and recyclable ionogels based on polyamidoamine (PAMAM) dendrimers via Schiff base reaction
Source: Royal Society of Chemistry journal article supplement (doi:10.1039/c7ra06916b), 2017-01-01
Supplement: c7ra06916b1.pdf [file c7ra06916b1.pdf]

## Supporting Information

# One-pot Synthesis of Self-healable and Recyclable Ionogels Based on Polyamidoamine (PAMAM) Dendrimers via Schiff Base Reaction

Xiaomeng Zhao, Shufei Guo, Hao Li, Jiahang Liu, Cuiping Su, Hongzan Song\*

Tab. S1  $M_w$  and the number of Amino for different generation PAMAM

| Dendrimer (Ethylenediamine core) | $M_w$ (g/mol) | Amino |
|----------------------------------|---------------|-------|
| PAMAM G0                         | 516           | 4     |
| PAMAM G1                         | 1429          | 8     |
| PAMAM G2                         | 3256          | 16    |
| PAMAM G3                         | 6908          | 32    |
| PAMAM G4                         | 14214         | 64    |
| PAMAM G5                         | 28824         | 128   |

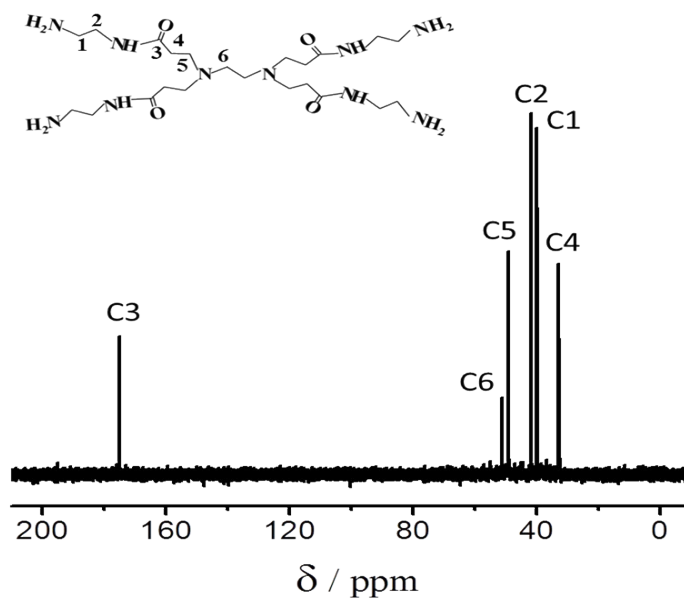

Fig. S1.  $^{13}\text{C}$  NMR spectra of PAMAM G0

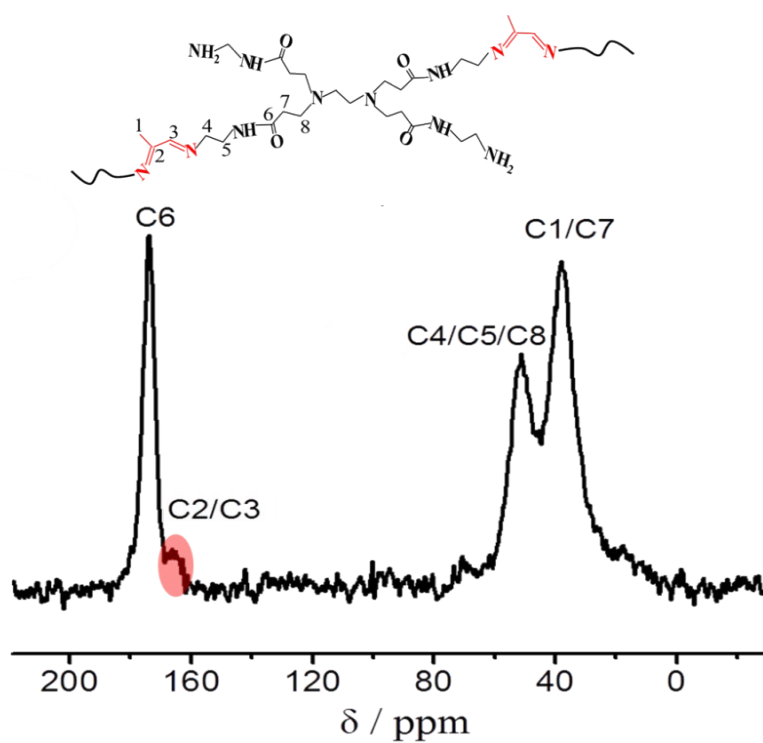

Fig. S2. Solid-state  $^{13}\text{C}$  NMR spectra of ionogel (PAMAM G0)

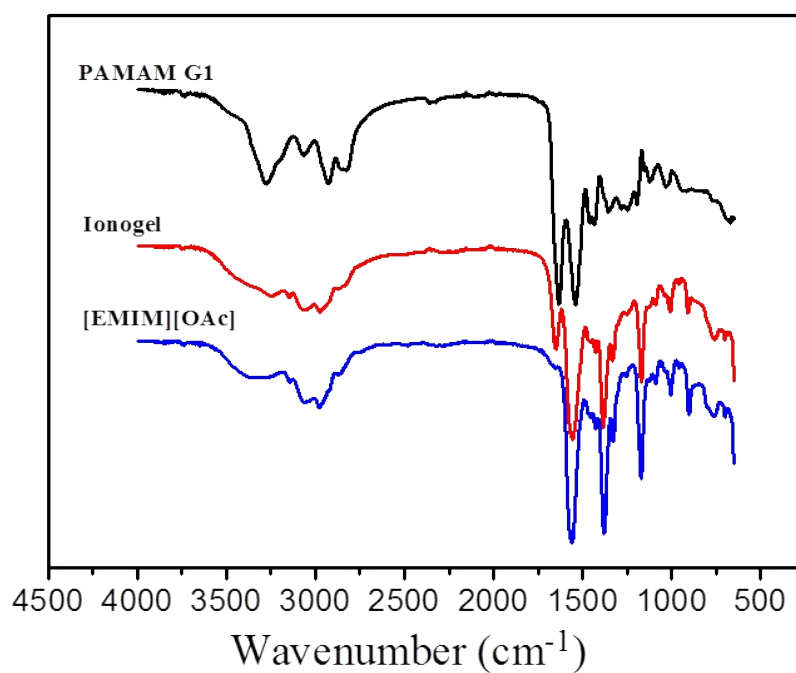

Fig. S3. FTIR spectras of PAMAM, neat ionic liquid, and Ionogel.

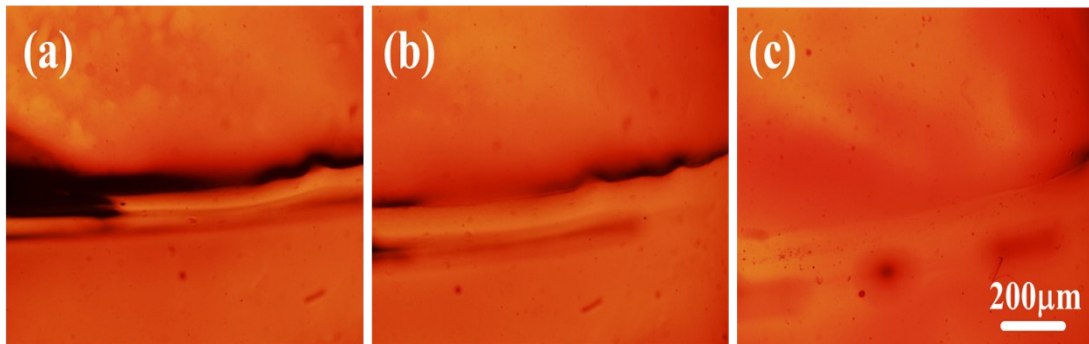

**Fig. S4.** Optical images of self-healing process: after knife-cut and free standing for (a) 0.1h, (b) 0.5h, and (c) 1h.

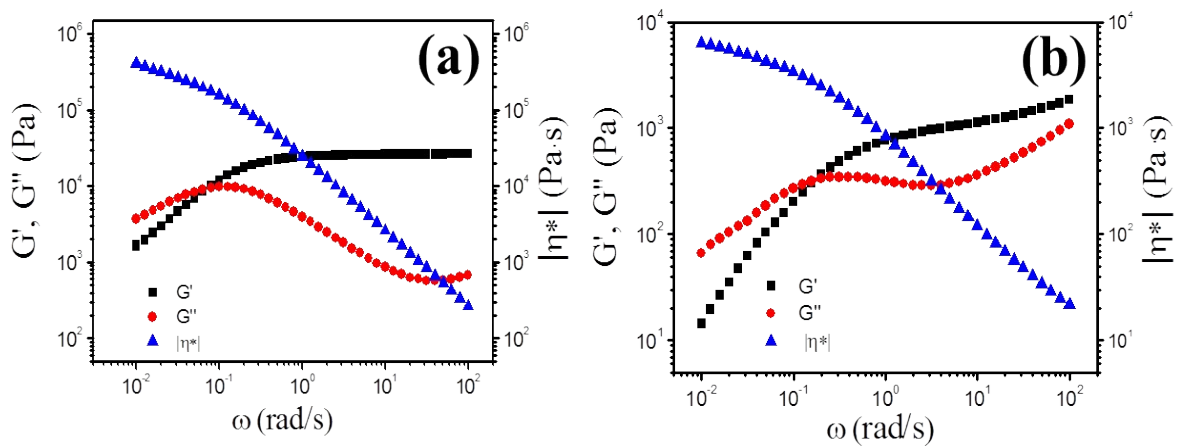

**Fig. S5.** Changes of  $G'$ ,  $G''$ , and  $|\eta^*|$  as a function of  $\omega$ , at 25 °C for 30% ionogel with different generation of PAMAM: (a) G1 and (b) G4.

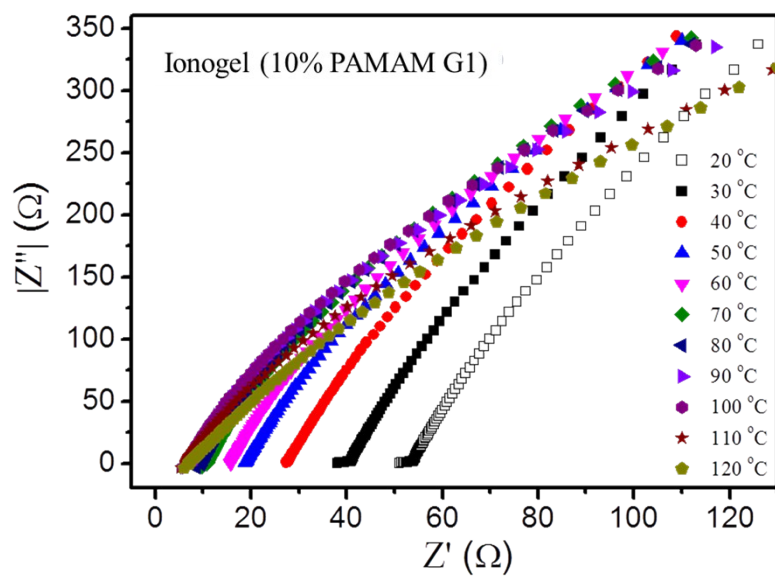

**Fig. S6.** The impedance plots for ionogel (10% PAMAM G1) at different temperature.
